# Supplementary material
Source: MDPI journal article supplement (https://www.mdpi.com/1424-2818/13/9/412)
Supplement: s1 [file s1]

**Table S3.** Status of parrots (Psittaciformes) in the USA recorded in the GAVIA, eBird, and iNaturalist databases (This Study\* in table) compared with those in recent and in-depth studies and reviews. Species arranged in alphabetical order of scientific name.

| Scientific Name                   | Common Name               | Continental U.S. |                           | Hawaiian Islands |                               | Puerto Rico |                          |
|-----------------------------------|---------------------------|------------------|---------------------------|------------------|-------------------------------|-------------|--------------------------|
|                                   |                           | This Study*      | Uehling et al. 2019, 2021 | This Study*      | VanderWerf and Kalodimos 2021 | This Study* | Falcón and Tremblay 2018 |
| <i>Agapornis fischeri</i>         | Fischer's Lovebird        | Introduced       | Observed                  |                  |                               | Observed    | Breeding                 |
| <i>Agapornis personatus</i>       | Yellow-collared Lovebird  | Introduced       | Naturalized               |                  | Observed                      | Observed    | Breeding                 |
| <i>Agapornis pullarius</i>        | Red-headed Lovebird       |                  | Observed                  |                  |                               |             |                          |
| <i>Agapornis roseicollis</i>      | Rosy-faced Lovebird       | Naturalized      | Naturalized               | Breeding         | Naturalized                   | Observed    | Breeding                 |
| <i>Amazona aestiva</i>            | Turquoise-fronted Amazon  | Breeding         | Naturalized               | Introduced       | Observed                      | Introduced  | Breeding                 |
| <i>Amazona albifrons</i>          | White-fronted Amazon      | Breeding         | Naturalized               |                  |                               | Introduced  | Naturalized              |
| <i>Amazona amazonica</i>          | Orange-winged Amazon      | Naturalized      | Naturalized               |                  | Observed                      | Naturalized | Naturalized              |
| <i>Amazona auropalliata</i>       | Yellow-naped Amazon       | Breeding         | Observed                  |                  |                               |             |                          |
| <i>Amazona autumnalis</i>         | Red-lored Amazon          | Naturalized      | Naturalized               |                  | Observed                      |             |                          |
| <i>Amazona barbadensis</i>        | Yellow-shouldered Amazon  | Introduced       |                           |                  |                               |             |                          |
| <i>Amazona farinosa</i>           | Southern Mealy Amazon     | Introduced       | Observed                  |                  |                               |             |                          |
| <i>Amazona festiva</i>            | Festive Amazon            | Introduced       |                           |                  |                               |             |                          |
| <i>Amazona finschi</i>            | Lilac-crowned Amazon      | Naturalized      | Naturalized               |                  |                               |             |                          |
| <i>Amazona leucocephala</i>       | Cuban Amazon              |                  |                           |                  |                               |             | Breeding                 |
| <i>Amazona ochrocephala</i>       | Yellow-crowned Amazon     | Breeding         | Naturalized               | Introduced       |                               | Naturalized | Naturalized              |
| <i>Amazona oratrix</i>            | Yellow-headed Amazon      | Naturalized      | Naturalized               |                  | Observed                      | Naturalized | Naturalized              |
| <i>Amazona pretrei</i>            | Red-spectacled Amazon     | Introduced       |                           |                  |                               |             |                          |
| <i>Amazona ventralis</i>          | Hispaniolan Amazon        | Breeding         | Observed                  |                  |                               | Naturalized | Breeding                 |
| <i>Amazona viridigenalis</i>      | Red-crowned Amazon        | Naturalized      | Naturalized               | Naturalized      | Naturalized                   | Naturalized | Naturalized              |
| <i>Amazona xantholora</i>         | Yucatan Amazon            | Introduced       | Observed                  |                  |                               |             |                          |
| <i>Anodorhynchus hyacinthinus</i> | Hyacinth Macaw            | Introduced       | Observed                  |                  |                               |             |                          |
| <i>Ara ararauna</i>               | Blue-and-yellow Macaw     | Breeding         | Naturalized               | Breeding         | Observed                      | Naturalized | Naturalized              |
| <i>Ara chloropterus</i>           | Red-and-green Macaw       | Introduced       | Observed                  |                  |                               | Introduced  | Breeding                 |
| <i>Ara macao</i>                  | Scarlet Macaw             | Introduced       | Observed                  | Introduced       | Observed                      |             | Naturalized              |
| <i>Ara militaris</i>              | Military Macaw            | Introduced       | Observed                  | Breeding         | Observed                      |             | Breeding                 |
| <i>Ara severus</i>                | Chestnut-fronted Macaw    | Naturalized      | Naturalized               |                  |                               |             |                          |
| <i>Aratinga jandaya</i>           | Jandaya Parakeet          |                  | Observed                  |                  | Observed                      |             |                          |
| <i>Aratinga nenday</i>            | Nanday Parakeet           | Naturalized      | Naturalized               | Naturalized      | Observed                      | Naturalized | Breeding                 |
| <i>Aratinga weddellii</i>         | Dusky-headed Parakeet     | Naturalized      | Observed                  |                  |                               |             |                          |
| <i>Bolborhynchus lineola</i>      | Barred Parakeet           |                  | Observed                  |                  |                               |             |                          |
| <i>Brotogeris chiriri</i>         | Yellow-chevroned Parakeet | Naturalized      | Naturalized               |                  |                               | Observed    |                          |
| <i>Brotogeris jugularis</i>       | Orange-chinned Parakeet   | Introduced       |                           | Introduced       | Observed                      |             |                          |
| <i>Brotogeris pyrrhoptera</i>     | Grey-cheeked Parakeet     | Introduced       |                           |                  |                               |             |                          |

|                                    |                          |             |             |            |          |             |             |
|------------------------------------|--------------------------|-------------|-------------|------------|----------|-------------|-------------|
| <i>Brotogeris sanctithomae</i>     | Tui Parakeet             | Introduced  |             |            |          |             |             |
| <i>Brotogeris versicolurus</i>     | White-winged Parakeet    | Naturalized | Naturalized |            |          | Naturalized | Naturalized |
| <i>Cacatua alba</i>                | White Cockatoo           | Introduced  |             | Observed   | Breeding | Observed    | Breeding    |
| <i>Cacatua galerita</i>            | Sulphur-crested Cockatoo | Naturalized | Observed    | Breeding   | Observed |             | Breeding    |
| <i>Cacatua goffiniana</i>          | Tanimbar Corella         | Introduced  |             | Breeding   | Breeding | Observed    | Breeding    |
| <i>Cacatua moluccensis</i>         | Salmon-crested Cockatoo  | Introduced  |             | Introduced | Breeding | Observed    | Breeding    |
| <i>Cacatua sanguinea</i>           | Little Corella           | Observed    |             | Observed   |          | Observed    |             |
| <i>Cacatua sulphurea</i>           | Yellow-crested Cockatoo  |             |             |            | Observed |             |             |
| <i>Chalcopsitta atra</i>           | Black Lory               |             |             | Introduced |          |             |             |
| <i>Cyanoliseus patagonus</i>       | Burrowing Parakeet       | Introduced  | Observed    | Breeding   | Breeding |             |             |
| <i>Cyanoramphus novaezelandiae</i> | Red-crowned Parakeet     |             | Observed    |            |          |             |             |
| <i>Diopsittaca nobilis</i>         | Red-shouldered Macaw     | Introduced  |             |            |          |             |             |
| <i>Eclectus roratus</i>            | Eclectus Parrot          | Introduced  |             | Introduced | Observed |             |             |
| <i>Enicognathus leptorhynchus</i>  | Slender-billed Parakeet  |             |             |            | Observed |             |             |
| <i>Eolophus roseicapilla</i>       | Galah                    | Introduced  |             | Introduced | Observed |             |             |
| <i>Eos bornea</i>                  | Red Lory                 | Breeding    | Observed    |            |          |             |             |
| <i>Eupsittula aurea</i>            | Peach-fronted Parakeet   | Introduced  | Observed    |            |          |             |             |
| <i>Eupsittula canicularis</i>      | Orange-fronted Parakeet  | Naturalized | Observed    |            | Observed | Naturalized | Naturalized |
| <i>Eupsittula nana</i>             | Olive-throated Parakeet  |             | Observed    |            |          | Introduced  |             |
| <i>Eupsittula pertinax</i>         | Brown-throated Parakeet  | Naturalized |             |            |          | Breeding    | Breeding    |
| <i>Forpus coelestis</i>            | Pacific Parrotlet        | Observed    | Observed    |            |          |             |             |
| <i>Lorius garrulus</i>             | Chattering Lory          | Introduced  |             |            |          |             |             |
| <i>Melopsittacus undulatus</i>     | Budgerigar               | Naturalized | Naturalized | Introduced | Observed | Naturalized | Breeding    |
| <i>Myiopsitta monachus</i>         | Monk Parakeet            | Naturalized | Naturalized | Introduced | Observed | Naturalized | Naturalized |
| <i>Nymphicus hollandicus</i>       | Cockatiel                | Introduced  | Observed    | Introduced | Observed | Introduced  | Breeding    |
| <i>Pionites melanocephalus</i>     | Black-headed Parrot      | Introduced  | Observed    |            |          |             |             |
| <i>Pionus maximiliani</i>          | Scaly-headed Parrot      | Observed    | Observed    |            |          |             |             |
| <i>Pionus senilis</i>              | White-crowned Parrot     | Introduced  | Observed    |            | Observed |             |             |
| <i>Platycercus adscitus</i>        | Pale-headed Rosella      |             |             | Historic   |          |             |             |
| <i>Platycercus elegans</i>         | Crimson Rosella          | Introduced  | Observed    |            |          |             |             |
| <i>Platycercus eximius</i>         | Eastern Rosella          | Introduced  |             |            |          |             |             |
| <i>Poicephalus crassus</i>         | Niam-niam Parrot         | Introduced  |             |            |          |             |             |
| <i>Poicephalus meyeri</i>          | Meyer's Parrot           |             | Observed    | Introduced | Observed |             |             |
| <i>Poicephalus rueppellii</i>      | Rüppell's Parrot         | Breeding    |             |            |          |             |             |
| <i>Poicephalus senegalus</i>       | Senegal Parrot           | Breeding    |             | Introduced | Observed | Introduced  | Breeding    |
| <i>Primolius auricollis</i>        | Golden-collared Macaw    | Introduced  |             |            |          |             |             |
| <i>Probosciger aterrimus</i>       | Palm Cockatoo            |             |             |            | Observed |             |             |
| <i>Psephotus haematonotus</i>      | Red-rumped Parrot        | Introduced  |             |            |          |             |             |
| <i>Pseudeos fuscata</i>            | Dusky Lory               | Introduced  |             |            |          |             |             |

|                                      |                          |             |             |             |             |                       |             |
|--------------------------------------|--------------------------|-------------|-------------|-------------|-------------|-----------------------|-------------|
| <i>Psittacara chloropterus</i>       | Hispaniolan Parakeet     | Introduced  |             |             |             | Introduced            | Naturalized |
| <i>Psittacara erythrogenys</i>       | Red-masked Parakeet      | Naturalized | Naturalized | Breeding    | Naturalized | Observed              | Naturalized |
| <i>Psittacara finschi</i>            | Finsch's Parakeet        | Breeding    | Naturalized |             |             |                       |             |
| <i>Psittacara holochlorus</i>        | Green Parakeet           | Naturalized | Naturalized |             |             |                       |             |
| <i>Psittacara leucophthalmus</i>     | White-eyed Parakeet      | Breeding    |             |             |             |                       |             |
| <i>Psittacara mitratus</i>           | Mitred Parakeet          | Naturalized | Naturalized | Naturalized | Naturalized | Breeding              | Breeding    |
| <i>Psittacara wagleri</i>            | Scarlet-fronted Parakeet | Breeding    | Naturalized | Breeding    |             |                       |             |
| <i>Psittacula alexandri</i>          | Red-breasted Parakeet    | Introduced  |             |             |             |                       |             |
| <i>Psittacula columboides</i>        | Blue-winged Parakeet     | Introduced  |             |             |             |                       |             |
| <i>Psittacula cyanocephala</i>       | Plum-headed Parakeet     | Introduced  |             |             | Observed    |                       |             |
| <i>Psittacula eupatria</i>           | Alexandrine Parakeet     | Introduced  | Observed    | Introduced  |             |                       |             |
| <i>Psittacula krameri</i>            | Rose-ringed Parakeet     | Naturalized | Naturalized | Naturalized | Naturalized | Naturalized           | Breeding    |
| <i>Psittacula roseata</i>            | Blossom-headed Parakeet  | Introduced  |             |             |             |                       |             |
| <i>Psittacus erithacus</i>           | Grey Parrot              | Introduced  | Observed    | Introduced  | Observed    | Introduced            |             |
| <i>Pyrrhura frontalis</i>            | Maroon-bellied Parakeet  | Breeding    |             |             |             |                       |             |
| <i>Pyrrhura hoffmanni</i>            | Sulphur-winged Parakeet  |             |             |             |             |                       | Breeding    |
| <i>Pyrrhura leucotis</i>             | White-eared Parakeet     |             | Naturalized |             |             |                       |             |
| <i>Pyrrhura molinae</i>              | Green-cheeked Parakeet   | Breeding    |             |             |             | Observed              | Breeding    |
| <i>Pyrrhura rhodocephala</i>         | Rose-crowned Parakeet    |             |             |             | Observed    |                       |             |
| <i>Pyrrhura roseifrons</i>           | Rose-fronted Parakeet    |             |             |             |             |                       | Breeding    |
| <i>Rhynchopsitta pachyrhyncha</i>    | Thick-billed Parrot      | Naturalized | Observed    |             |             |                       |             |
| <i>Rhynchopsitta terrisi</i>         | Maroon-fronted Parrot    | Introduced  |             |             |             |                       |             |
| <i>Strigops habroptila</i>           | Kakapo                   | Introduced  |             |             |             |                       |             |
| <i>Tectocercus acuticaudatus</i>     | Blue-crowned Parakeet    | Naturalized | Naturalized | Introduced  | Breeding    | Historic/<br>Observed | Breeding    |
| <i>Trichoglossus chlorolepidotus</i> | Scaly-breasted Lorikeet  | Introduced  |             |             |             |                       |             |
| <i>Trichoglossus haematodus</i>      | Coconut Lorikeet         | Introduced  |             |             |             | Introduced            |             |
| <i>Trichoglossus moluccanus</i>      | Rainbow Lorikeet         |             | Observed    |             |             |                       |             |
| <i>Trichoglossus ornatus</i>         | Ornate Lorikeet          | Introduced  |             |             |             |                       |             |
| <i>Vini kuhlii</i>                   | Kuhl's Lorikeet          | Naturalized |             |             |             |                       |             |
