# Supplementary material
Source: MDPI journal article supplement (https://www.mdpi.com/1424-2818/13/9/412)
Supplement: s1 [file s1]

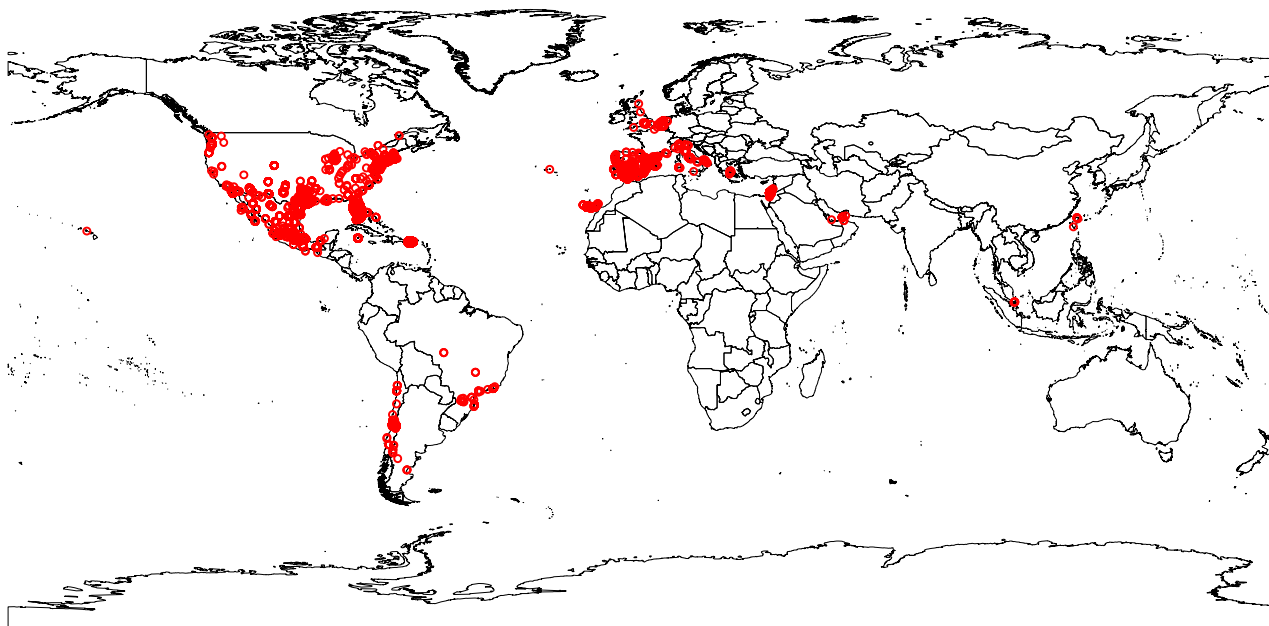

**Figure S1.** Distribution of sightings of Monk Parakeets (*Myiopsitta monachus*) outside of their native range based on records in eBird and iNaturalist. See text for explanation.

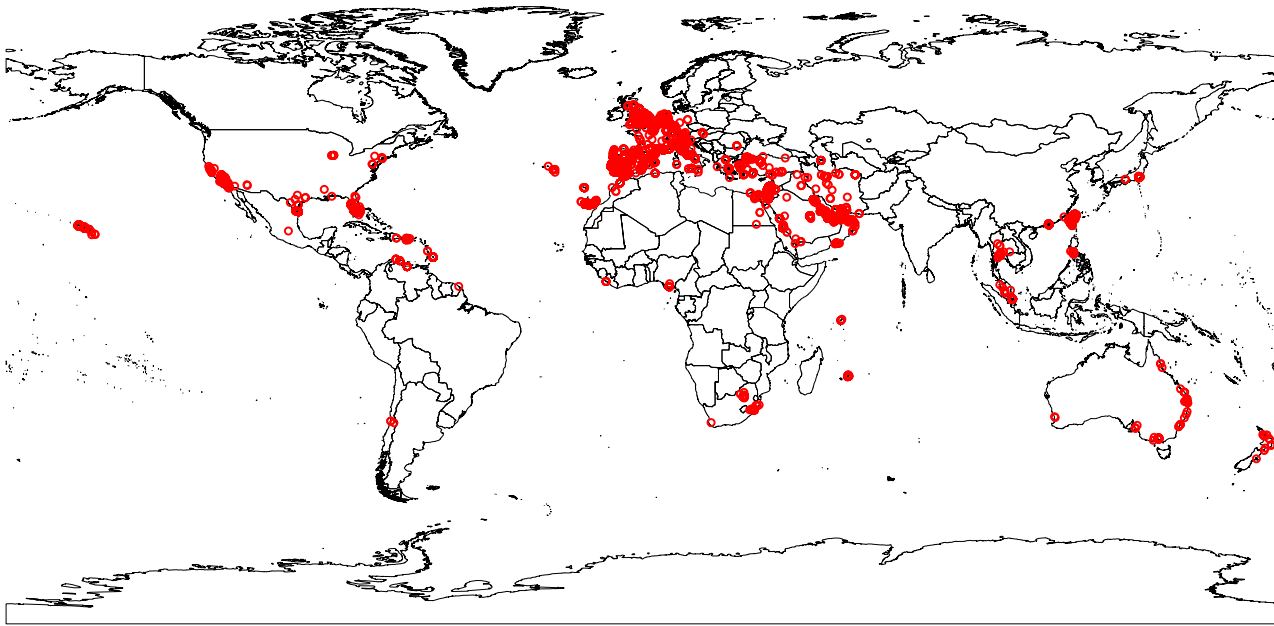

**Figure S2.** Distribution of sightings of Rose-ringed Parakeets (*Psittacula krameri*) outside of their native range based on records in eBird and iNaturalist. See text for explanation.

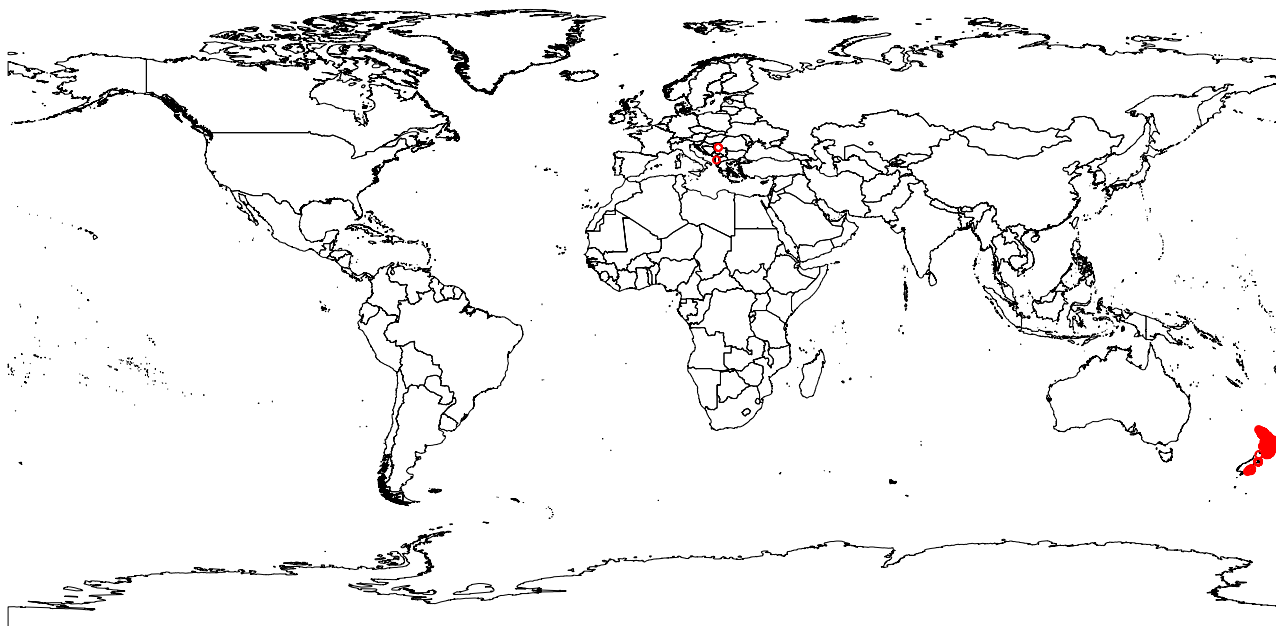

**Figure S3.** Distribution of sightings of Eastern Rosellas (*Platycercus eximus*) outside of their native range based on records in eBird and iNaturalist. See text for explanation.

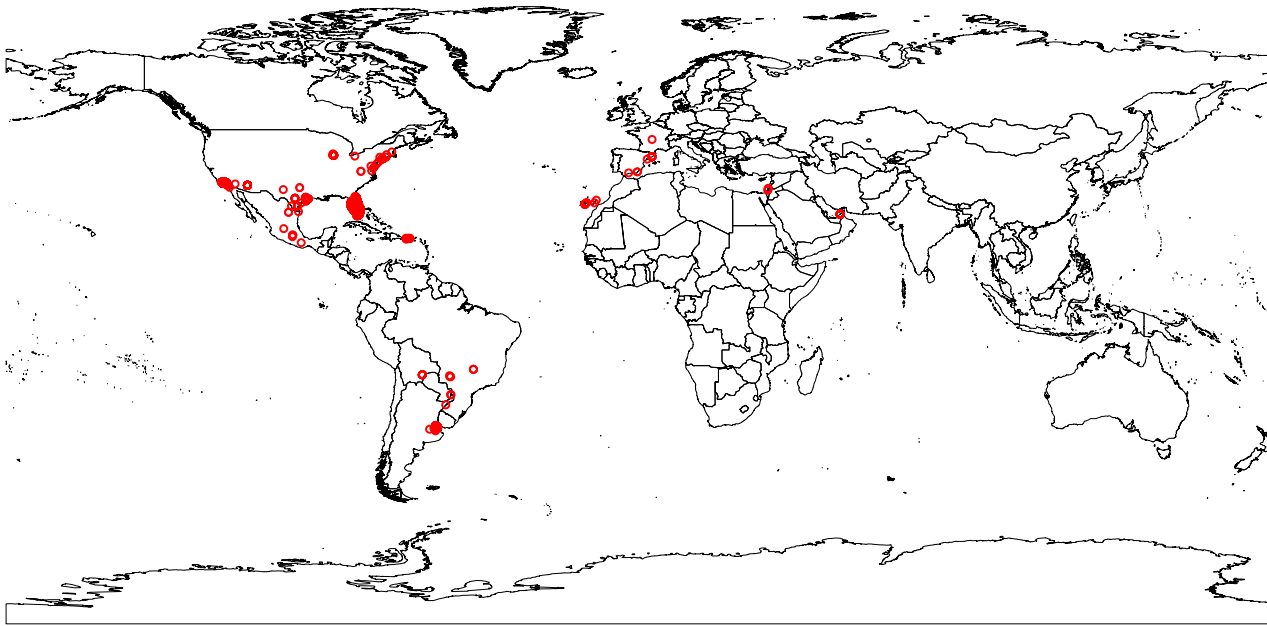

**Figure S4.** Distribution of sightings of Nanday Parakeets (*Aratinga nenday*) outside of their native range based on records in eBird and iNaturalist. See text for explanation.

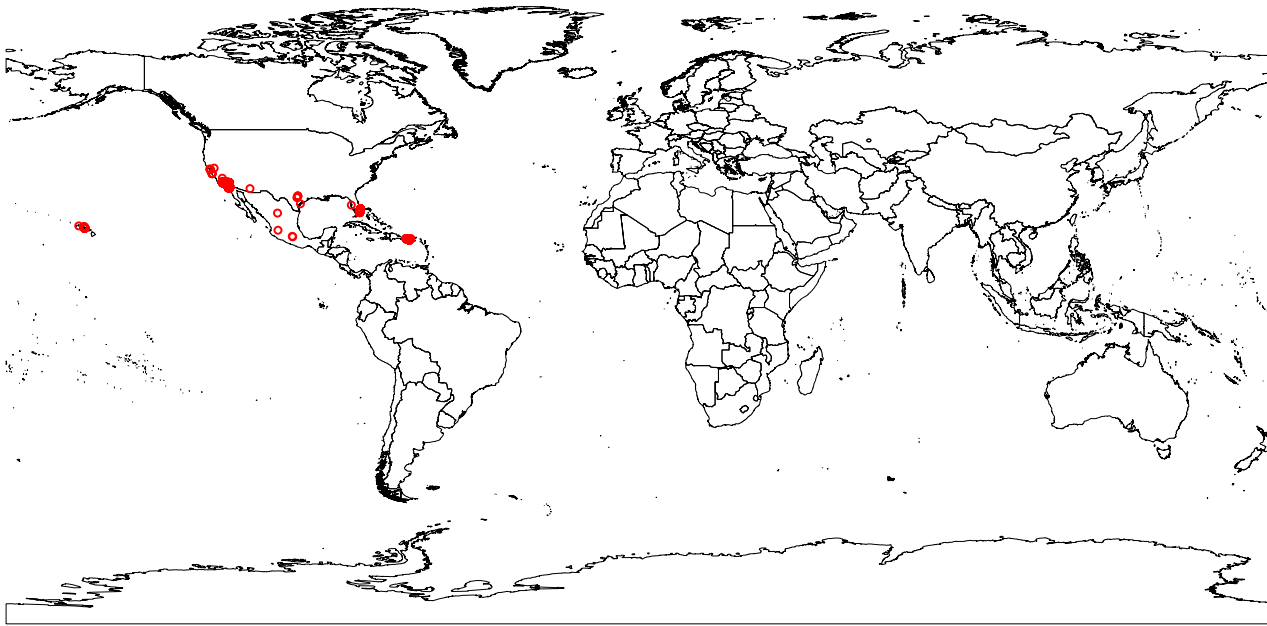

**Figure S5.** Distribution of sightings of Red-crowned Amazons (*Amazona viridigenalis*) outside of their native range based on records in eBird and iNaturalist. See text for explanation.

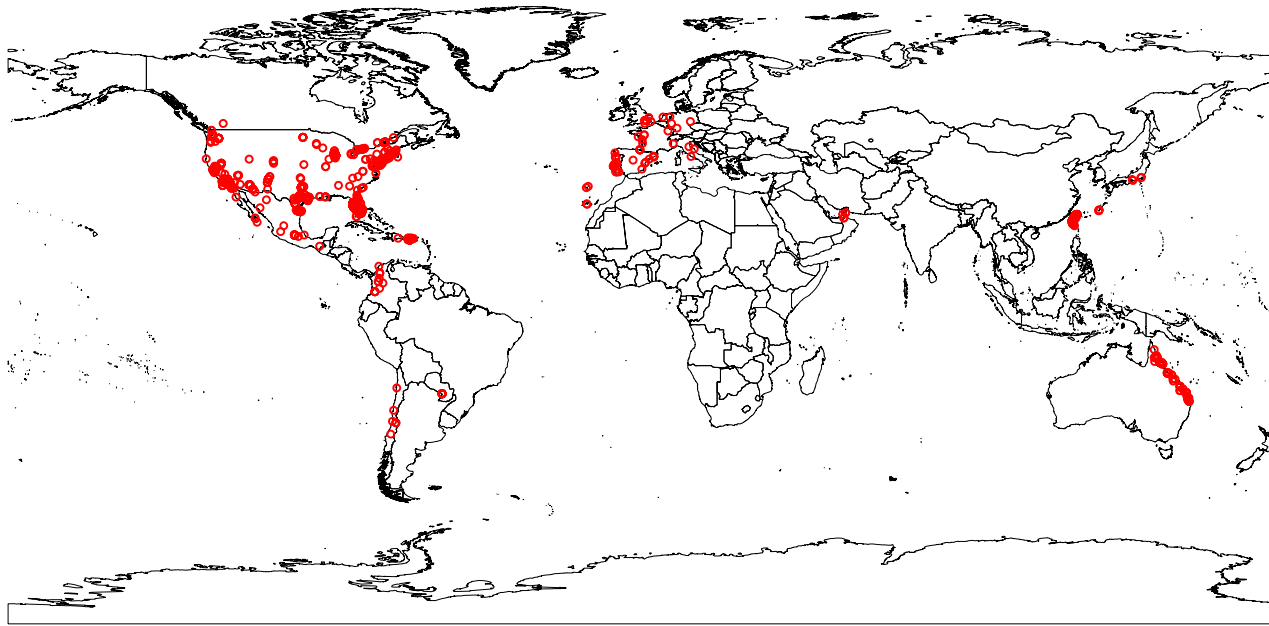

**Figure S6.** Distribution of sightings of Budgerigar (*Melopsittacus undulatus*) outside of their native range based on records in eBird and iNaturalist. See text for explanation.
