# Supplementary material
Source: MDPI journal article supplement (https://www.mdpi.com/1424-2818/13/9/412)
Supplement: s1 [file s1]

**Table S2.** A summary of the numbers of species of parrots (Psittaciformes) outside of their native range according to the GAVIA database, eBird and iNaturalist. Here the category Introduced includes the category Observed from Table S1. See text for definitions of each category. Note that the categories in this table are mutually exclusive. Thus, species counted in the Naturalized column are not counted in the Breeding column.

| Country                        | Naturalized | Breeding | Introduced | Historic | Total Species |
|--------------------------------|-------------|----------|------------|----------|---------------|
| Afghanistan                    | 0           | 0        | 1          | 0        | 1             |
| Algeria                        | 0           | 0        | 1          | 0        | 1             |
| Antigua and Barbuda            | 1           | 0        | 0          | 0        | 1             |
| Argentina                      | 1           | 0        | 11         | 0        | 12            |
| Aruba                          | 0           | 0        | 2          | 0        | 2             |
| Australia                      | 13          | 1        | 21         | 0        | 35            |
| Austria                        | 2           | 0        | 1          | 1        | 4             |
| Azerbaijan                     | 0           | 0        | 1          | 0        | 1             |
| Bahamas                        | 0           | 0        | 3          | 0        | 3             |
| Bahrain                        | 2           | 0        | 4          | 0        | 6             |
| Barbados                       | 1           | 3        | 4          | 0        | 8             |
| Belgium                        | 3           | 0        | 1          | 1        | 5             |
| Bermuda                        | 0           | 0        | 2          | 0        | 2             |
| Bolivia                        | 0           | 0        | 5          | 0        | 5             |
| Botswana                       | 1           | 0        | 1          | 0        | 2             |
| Brazil                         | 1           | 0        | 51         | 0        | 52            |
| British Indian Ocean Territory | 0           | 0        | 1          | 0        | 1             |
| British Virgin Islands         | 1           | 0        | 1          | 0        | 2             |
| Canada                         | 1           | 0        | 2          | 0        | 3             |
| Cape Verde                     | 0           | 1        | 0          | 0        | 1             |
| Cayman Islands                 | 2           | 3        | 1          | 0        | 6             |
| Chile                          | 1           | 0        | 4          | 0        | 5             |
| China                          | 4           | 0        | 1          | 0        | 5             |
| Christmas Island               | 0           | 0        | 1          | 0        | 1             |
| Colombia                       | 0           | 0        | 7          | 0        | 7             |
| Comoros                        | 1           | 0        | 1          | 0        | 2             |
| Cook Islands                   | 0           | 0        | 1          | 0        | 1             |
| Costa Rica                     | 1           | 0        | 1          | 0        | 2             |
| Croatia                        | 0           | 0        | 1          | 0        | 1             |
| Cuba                           | 1           | 0        | 0          | 0        | 1             |
| Curacao                        | 0           | 0        | 2          | 0        | 2             |
| Czech Republic                 | 1           | 0        | 0          | 0        | 1             |
| Denmark                        | 1           | 0        | 0          | 0        | 1             |
| Dominica                       | 1           | 0        | 0          | 0        | 1             |
| Dominican Republic             | 2           | 1        | 2          | 0        | 5             |
| Ecuador                        | 0           | 0        | 2          | 0        | 2             |
| Egypt                          | 1           | 0        | 1          | 0        | 2             |
| Equatorial Guinea              | 0           | 0        | 1          | 0        | 1             |
| Fiji                           | 1           | 0        | 3          | 0        | 4             |
| France                         | 4           | 0        | 6          | 0        | 10            |
| French Polynesia               | 0           | 0        | 2          | 0        | 2             |

|                      |    |   |    |   |    |
|----------------------|----|---|----|---|----|
| Germany              | 3  | 0 | 7  | 3 | 13 |
| Greece               | 2  | 0 | 3  | 0 | 5  |
| Grenada              | 0  | 0 | 1  | 0 | 1  |
| Guadeloupe           | 3  | 0 | 1  | 0 | 4  |
| Hong Kong            | 4  | 0 | 15 | 0 | 19 |
| India                | 1  | 0 | 5  | 0 | 6  |
| Indonesia            | 6  | 0 | 7  | 0 | 13 |
| Iran                 | 1  | 0 | 1  | 0 | 2  |
| Iraq                 | 1  | 0 | 0  | 0 | 1  |
| Ireland              | 0  | 0 | 1  | 0 | 1  |
| Israel               | 4  | 0 | 1  | 0 | 5  |
| Italy                | 4  | 0 | 3  | 0 | 7  |
| Jamaica              | 2  | 0 | 1  | 0 | 3  |
| Japan                | 5  | 0 | 0  | 0 | 5  |
| Jordan               | 2  | 0 | 0  | 0 | 2  |
| Kenya                | 5  | 0 | 1  | 0 | 6  |
| Kiribati             | 1  | 0 | 0  | 0 | 1  |
| Kuwait               | 1  | 0 | 3  | 0 | 4  |
| Lebanon              | 1  | 0 | 0  | 0 | 1  |
| Liberia              | 0  | 0 | 3  | 0 | 3  |
| Macao                | 1  | 0 | 0  | 0 | 1  |
| Malaysia             | 2  | 0 | 1  | 0 | 3  |
| Maldives             | 1  | 0 | 0  | 0 | 1  |
| Malta                | 1  | 0 | 1  | 0 | 2  |
| Martinique           | 2  | 0 | 1  | 1 | 4  |
| Mauritius            | 2  | 0 | 13 | 0 | 15 |
| Mayotte              | 1  | 0 | 0  | 0 | 1  |
| Mexico               | 7  | 0 | 13 | 0 | 20 |
| Morocco              | 0  | 0 | 1  | 0 | 1  |
| Mozambique           | 0  | 0 | 1  | 0 | 1  |
| Namibia              | 1  | 1 | 1  | 0 | 3  |
| Nepal                | 0  | 0 | 1  | 0 | 1  |
| Netherlands          | 2  | 0 | 3  | 0 | 5  |
| Netherlands Antilles | 3  | 1 | 1  | 0 | 5  |
| New Zealand          | 6  | 0 | 4  | 2 | 12 |
| Nigeria              | 0  | 0 | 1  | 0 | 1  |
| Norfolk Island       | 1  | 0 | 0  | 0 | 1  |
| Oman                 | 2  | 1 | 2  | 0 | 5  |
| Pakistan             | 0  | 0 | 1  | 0 | 1  |
| Palau                | 2  | 0 | 0  | 0 | 2  |
| Palestine            | 1  | 0 | 1  | 0 | 2  |
| Papua New Guinea     | 0  | 0 | 4  | 0 | 4  |
| Paraguay             | 0  | 0 | 3  | 0 | 3  |
| Peru                 | 1  | 0 | 10 | 0 | 11 |
| Philippines          | 1  | 0 | 8  | 0 | 9  |
| Portugal             | 2  | 0 | 9  | 0 | 11 |
| Puerto Rico          | 12 | 2 | 21 | 0 | 35 |
| Qatar                | 1  | 1 | 2  | 0 | 4  |
| Reunion              | 2  | 0 | 1  | 0 | 3  |

|                       |    |    |    |   |    |
|-----------------------|----|----|----|---|----|
| Romania               | 0  | 0  | 1  | 0 | 1  |
| Saint Kitts and Nevis | 0  | 0  | 1  | 0 | 1  |
| Sao Tome and Principe | 1  | 0  | 0  | 0 | 1  |
| Saudi Arabia          | 1  | 0  | 4  | 0 | 5  |
| Serbia                | 0  | 0  | 2  | 0 | 2  |
| Seychelles            | 1  | 0  | 2  | 0 | 3  |
| Singapore             | 7  | 1  | 11 | 0 | 19 |
| Slovakia              | 1  | 0  | 0  | 0 | 1  |
| Slovenia              | 1  | 0  | 0  | 0 | 1  |
| Somalia               | 0  | 0  | 1  | 0 | 1  |
| South Africa          | 2  | 0  | 11 | 2 | 15 |
| Spain                 | 8  | 6  | 38 | 0 | 52 |
| Switzerland           | 0  | 0  | 3  | 1 | 4  |
| Syria                 | 0  | 0  | 1  | 0 | 1  |
| Taiwan                | 7  | 2  | 4  | 0 | 13 |
| Tanzania              | 3  | 0  | 1  | 1 | 5  |
| Thailand              | 1  | 0  | 4  | 0 | 5  |
| Tonga                 | 1  | 0  | 0  | 0 | 1  |
| Trinidad and Tobago   | 2  | 0  | 2  | 0 | 4  |
| Turkey                | 2  | 0  | 1  | 0 | 3  |
| Uganda                | 1  | 0  | 0  | 0 | 1  |
| Ukraine               | 0  | 0  | 1  | 1 | 2  |
| United Arab Emirates  | 2  | 2  | 6  | 0 | 10 |
| United Kingdom        | 4  | 2  | 2  | 1 | 9  |
| United States         | 23 | 17 | 46 | 1 | 87 |
| Uruguay               | 0  | 0  | 3  | 0 | 3  |
| Venezuela             | 1  | 2  | 7  | 0 | 10 |
| Virgin Islands, U.S.  | 4  | 0  | 2  | 0 | 6  |
| Yemen                 | 2  | 0  | 0  | 0 | 2  |
| Zambia                | 1  | 0  | 0  | 0 | 1  |
